# Supplementary material
Source: publisher site journal article supplement (https://www.dovepress.com/article/452134)
Supplement: Supplementary file 1 [file get_supplementary_file.php]

Microfluidic fabricated liposomes for Nutlin-3a ocular delivery as potential candidate for proliferative vitreoretinal diseases treatment

Elisabetta Esposito1,*, Elena Pozza2, Catia Contado1, Walter Pula1, Olga Bortolini3, Daniele Ragno1, Sofia Toldo3, Fabio Casciano4, Agnese Bondi1, Enrico Zauli2, Paola Secchiero4, Giorgio Zauli3, and Elisabetta Melloni4,*

**Table S1**. Means ± SD of ARPE-19 cell viability after treatment for 24h or 48h with LIPO0.5 and LIPO0.8.

|  | **24h** | | **48h** | |
| --- | --- | --- | --- | --- |
| **Treatments (**μM) | **LIPO0.5** | **LIPO0.8** | **LIPO0.5** | **LIPO0.8** |
| 0 | 100.00 ± 0.00 | 100.00 ± 0.00 | 100.00 ± 0.00 | 100.00 ± 0.00 |
| 25 | 101.80 ± 7.95 | 99.90 ± 6.69 | 105.40 ± 11.98 | 107.50 ± 5.42 |
| 10 | 102.40 ± 7.03 | 99.87 ± 6.94 | 103.70 ± 10.93 | 107.20 ± 5.48 |
| 5 | 102.20 ± 2.40 | 98.63 ± 9.61 | 104.90 ± 12.28 | 103.00 ± 4.50 |
| 1 | 101.80 ± 4.89 | 101.40 ± 7.87 | 98.64 ± 9.38 | 101.10 ± 4.02 |
| 0,5 | 97.52 ± 3.92 | 98.56 ± 6.53 | 95.25 ± 9.39 | 99.22 ± 5.38 |
| 0,1 | 98.37 ± 2.77 | 95.70 ± 9.12 | 95.50 ± 8.19 | 99.52 ± 4.79 |

**Table S2.** Means ± SD of ARPE-19 cell viability, MTT test and cell cycle S phases after treatment for 24 h or 48 h with NUT or LIPO0.5-NUT.

| Cell viability (%) | | | | | | |
| --- | --- | --- | --- | --- | --- | --- |
|  | 24 h | | | 48 h | | |
| **Treatments (μM)** | **NUT** | **LIPO0.5-NUT** | **P value*** | **NUT** | **LIPO0.5-NUT** | **P value*** |
| 25 | 53.60 ± 4.93 | 59.64 ± 9.87 | >0.9999 | 31.57 ± 7.71 | 38.53 ± 18.01 | >0.9999 |
| 10 | 63.45 ± 5.85 | 67.17 ± 12.17 | >0.9999 | 37.64 ± 8.04 | 49.27 ± 22.94 | >0.9999 |
| 1 | 82.07 ± 10.16 | 84.18 ± 9.16 | >0.9999 | 58.13 ± 8.92 | 72.75 ± 14.12 | 0.3572 |

| MTT (%) | | | | | | |
| --- | --- | --- | --- | --- | --- | --- |
|  | 24 h | | | 48 h | | |
| **Treatments (μM)** | **NUT** | **LIPO0.5-NUT** | **P value*** | **NUT** | **LIPO0.5-NUT** | **P value*** |
| 25 | 61.74 ± 7.37 | 66.72 ± 16.34 | 0,9791 | 46.26 ± 6.15 | 58.48 ± 16.60 | 0.6290 |
| 10 | 71.17 ± 6.73 | 67.60 ± 15.03 | 0,9963 | 54.19 ± 11.91 | 56.42 ± 17.09 | >0.9999 |
| 1 | 85.77 ± 5.35 | 77.72 ± 15.45 | 0,8196 | 76.83 ± 13.68 | 68.37 ± 18.80 | 0.9023 |

| S phase (%) | | | | | | |
| --- | --- | --- | --- | --- | --- | --- |
|  | 24 h | | | 48 h | | |
| **Treatments (μM)** | **NUT** | **LIPO0.5-NUT** | **P value*** | **NUT** | **LIPO0.5-NUT** | **P value*** |
| 25 | 0.55 ± 0.11 | 0.55 ± 0.11 | >0.9999 | 0.79 ± 0.42 | 0.91 ± 0.83 | >0.9999 |
| 10 | 1.15 ± 0.8 | 0.67 ± 0.12 | >0.9999 | 0.51 ± 0.33 | 0.52 ± 0.24 | >0.9999 |
| 1 | 19.61± 6.6 | 16.70 ± 0.1 | >0.9999 | 11.09 ± 2.32 | 11.39 ± 2.68 | >0.9999 |

*p values obtained by the statistical analysis (one-way ANOVA followed by Bonferroni post hoc test for multiple corrections) comparing NUT vs LIPO0.5-NUT data sets.

**Figure S1**


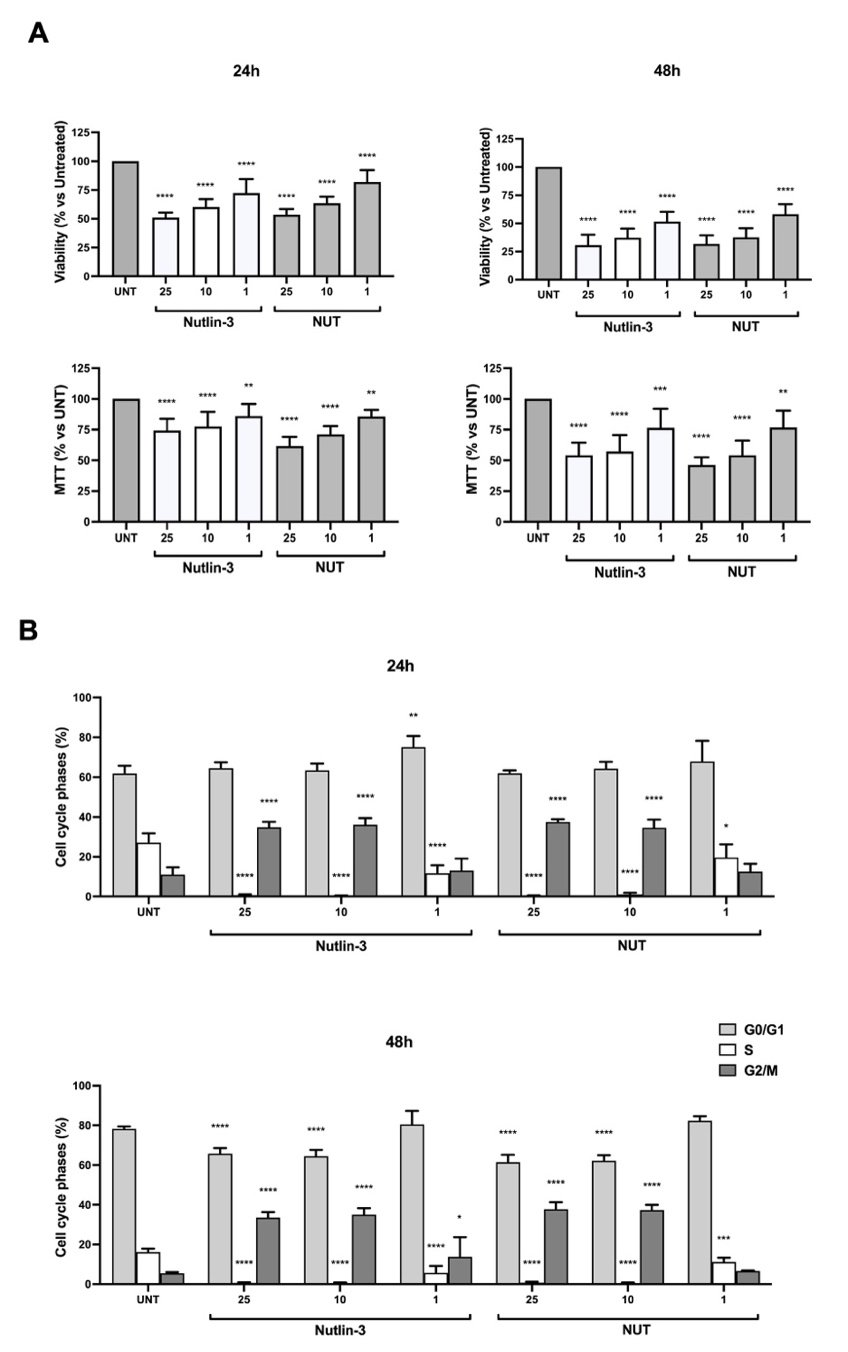


**Figure S1**: **Nutlin-3 and NUT effects’ comparison on ARPE-19 cell line**. Cell viability (**A**) and cell cycle (**B**) evaluation in ARPE-19 cells treated for 24h or 48h with three different Nutlin-3 and NUT concentrations (25-10-1 μM). Results are reported as mean ± SD of at least three independent experiments.  Statistical analysis was performed by ANOVA followed by Bonferroni post hoc test for pairwise comparisons. * p < 0.1, ** p < 0.01, *** p < 0.001, **** p < 0.0001.

**Figure S2**


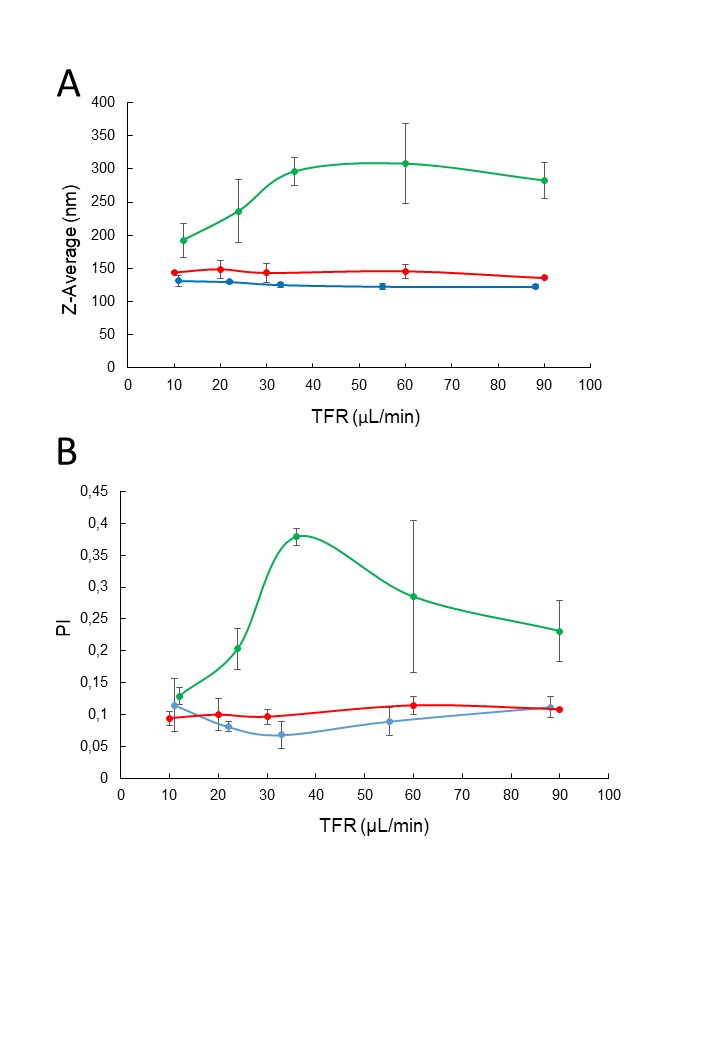


**Figure S2:**Size distribution parameters of vesicles obtained by microfluidics. Z-Average (A) and PI (B) were evaluated as a function of TFR, using FRR 2:1 (green), 4:1 (red) or 10:1 (blue) and PC 30 mg/ml.

**Figure S3**

**
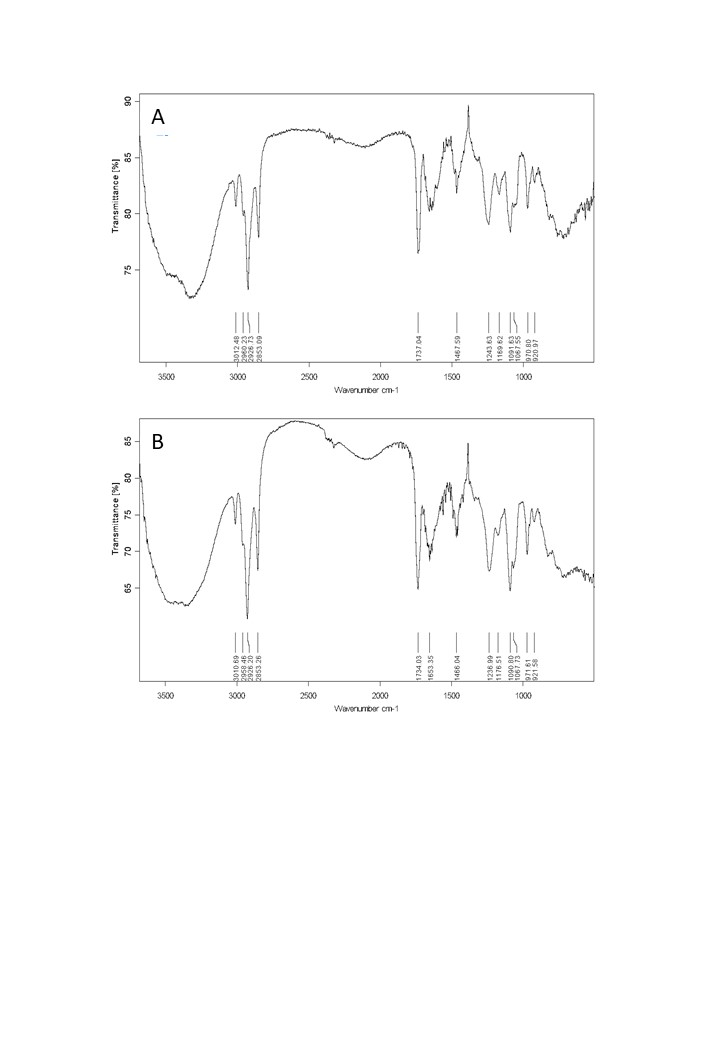
**

**Figure S3**. FTIR spectra of LIPO0.8 (A), LIPO0.8-NUT (B).

**Figure S4**

**
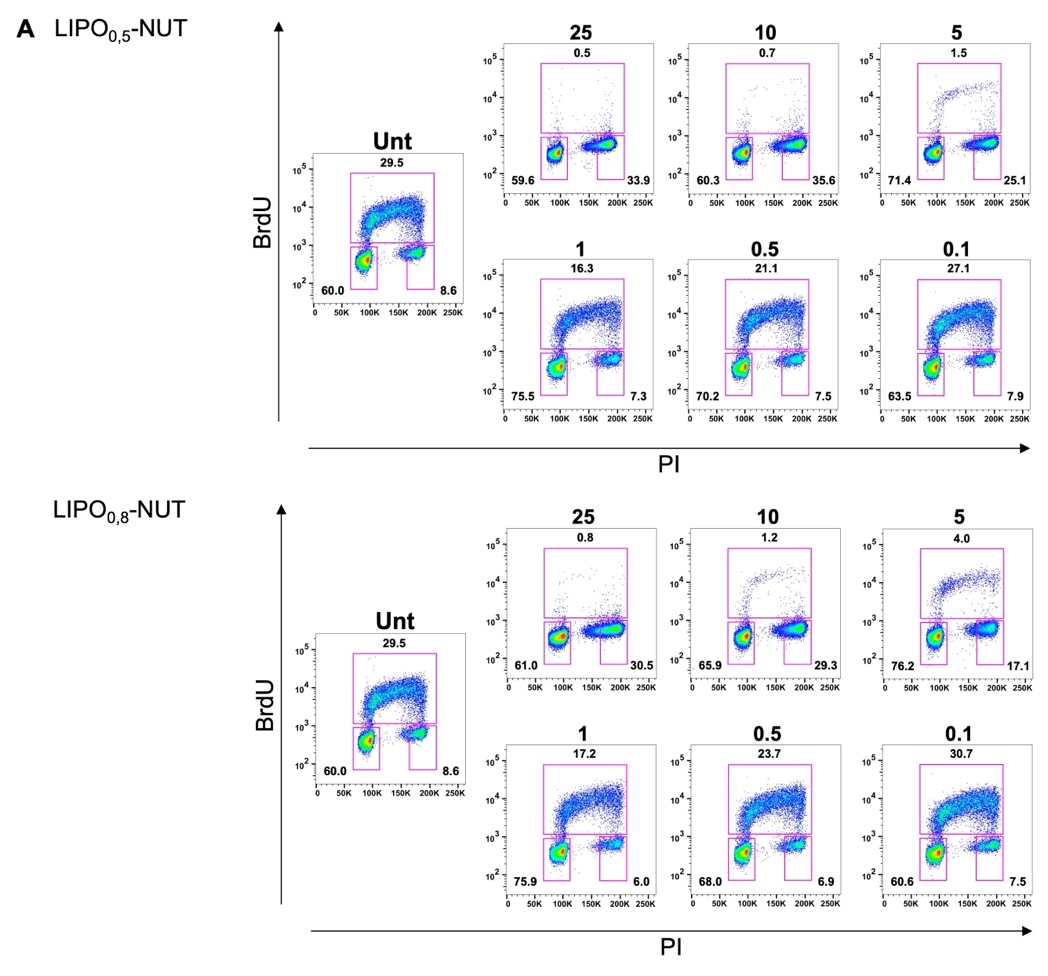
**

**
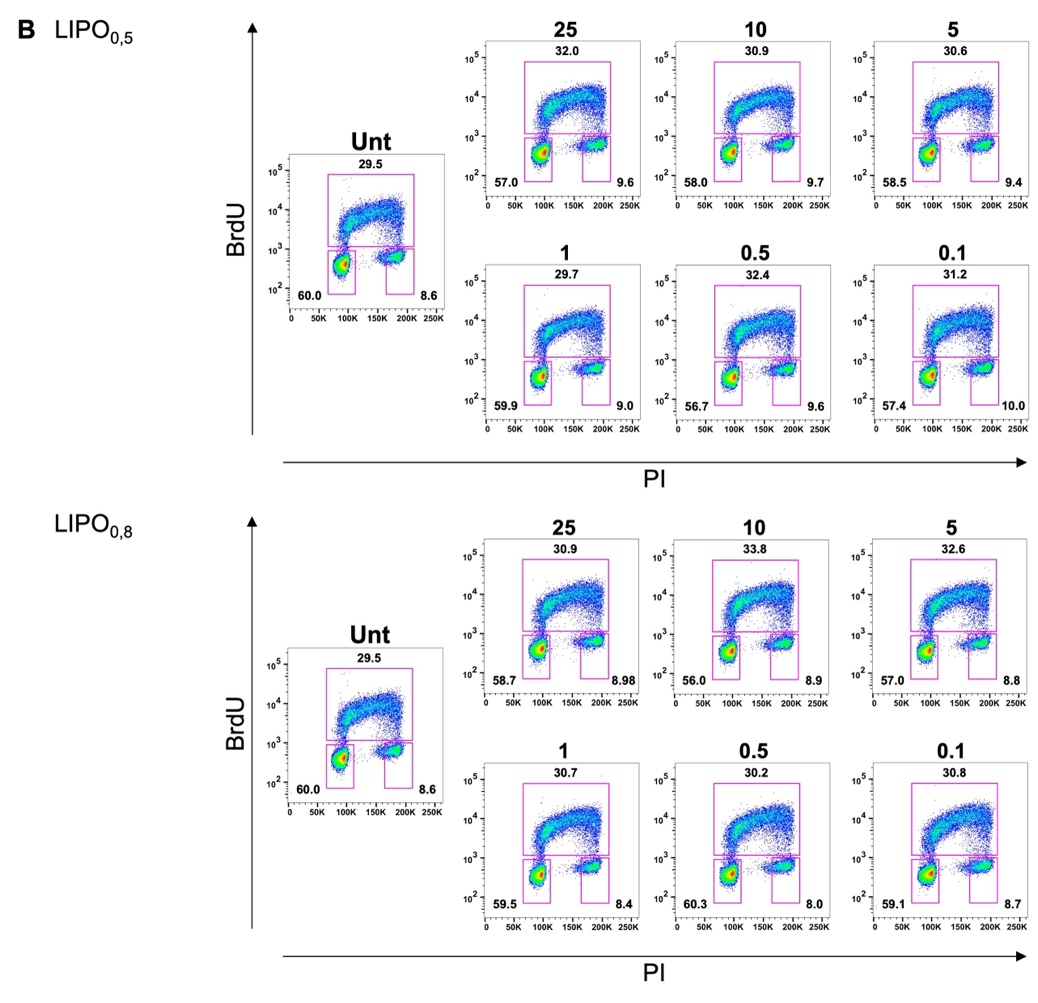
**

**Figure S4: Representative panels of ARPE-19 cell cycle cytofluorimetric analysis after LIPO-NUT or LIPO treatment**. Cell cycle evaluation in ARPE-19 cells treated for 24h or 48h with different LIPO0.5-NUT, LIPO0.8-NUT, LIPO0.5 and LIPO0.8 (concentration range 25-0.1 μM). In **A**, a panel reporting a representative experiment performed for cell cycle analysis after 24h of treatment with LIPO0.5-NUT and LIPO0.8-NUT, used in the range of concentration described above, is shown. In **B**, a panel reporting a representative experiment performed for cell cycle analysis after 24h of treatment with LIPO0.5 and LIPO0.8, used in the range of concentration of LIPO-NUT, is reported.
